# Supplementary material
Source: PubMed Central journal article supplement (PMC4902169)
Supplement: NIHMS781465-supplement-supplement_1.pdf [file NIHMS781465-supplement-supplement_1.pdf]

Supplementary Table 1: Hierarchical Regression Analysis predicting Birthweight from sociodemographic variables, trauma history and depression.

| Variable                                                                       | <i>b</i> |
|--------------------------------------------------------------------------------|----------|
| Model 1 <sup>a</sup>                                                           |          |
| Maternal age                                                                   | -.09     |
| African American ethnicity                                                     | -.11     |
| BMI                                                                            | .14 **   |
| Education (years)                                                              | -.03     |
| Single                                                                         | .15 *    |
| Primigravid                                                                    | -.08     |
| Medicaid recipient                                                             | .04      |
| C-section                                                                      | .09      |
| Smoking in pregnancy                                                           | -.05     |
| Model 2 <sup>b</sup> : Model 1, TE and depression levels at 32 weeks gestation |          |
|                                                                                |          |
| TE                                                                             | .18 *    |
| Depressive symptoms at 32 weeks gestation                                      | .02      |
| Model 3 <sup>c</sup> :                                                         |          |
| Model 2, TE * depression levels at 32 weeks gestation                          | -.29 **  |

*Note.* BMI = body mass index; c-section = Cesarean section; TE = trauma exposure.

<sup>a</sup>Model 1  $R^2 = .065$ ,  $F(9, 318) = 2.44^*$ . <sup>b</sup>Model 2  $R^2 = .076$ ,  $F(2, 216) = .236^{**}$ . <sup>c</sup>Model 3  $R^2 = .097$ ,  $F(3, 316) = 2.82^{***}$ .

\* $p < .05$ . \*\* $p < .01$ . \*\*\* $p < .001$ .

Supplementary Table 2: Hierarchical Regression Analysis predicting Birth Weight from sociodemographic variables, age at first TE and depression.

| Variable                                                                                      | <i>b</i> |
|-----------------------------------------------------------------------------------------------|----------|
| Model 1 <sup>a</sup>                                                                          |          |
| Maternal age                                                                                  | -.08     |
| African American ethnicity                                                                    | -.11     |
| BMI                                                                                           | .12 *    |
| Education (years)                                                                             | -.03     |
| Single                                                                                        | .16 **   |
| Primigravid                                                                                   | -.06     |
| Medicaid recipient                                                                            | .08      |
| C-section                                                                                     | .06      |
| Smoking in pregnancy                                                                          | -.04     |
| Model 2 <sup>b</sup>                                                                          |          |
| Model 1, first TE < 18 years old and >18 years old                                            |          |
| First TE ≥18 years                                                                            | -.01     |
| First TE <18 years                                                                            | .18 *    |
| Model 3 <sup>c</sup> : Model 2, first TE <18 years* depressive symptoms at 32 weeks gestation |          |
| First TE <18 years* depressive symptoms at 32 weeks gestation                                 | -.23**   |

*Note.* BMI = body mass index; c-section = Cesarean section; TE = trauma exposure.

<sup>a</sup>Model 1  $R^2 = .06$ ,  $F(9, 318) = 2.51^{**}$ . <sup>b</sup>Model 2  $R^2 = .062$ ,  $F(2, 316) = 2.05^*$ . <sup>c</sup>Model 3  $R^2 = .079$ ,  $F(3, 313) = 2.46^{**}$ .

\* $p < .05$ . \*\* $p < .01$ .
